# Supplementary material for: Integrated Adsorption-Photocatalytic Decontamination of Oxytetracycline from Wastewater Using S-Doped TiO2/WS2/Calcium Alginate Beads
Source: MDPI journal article supplement (doi:10.3390/catal12121676), 2022-12-19
Supplement: s1 [file s1]

Supplementary Materials

# Integrated adsorption-photocatalytic decontamination of oxy-tetracycline from wastewater using S-doped TiO<sub>2</sub>/WS<sub>2</sub>/calcium alginate beads

Rajeev Kumar <sup>1</sup>, Mohammad Omaish Ansari <sup>2,\*</sup>, Md Abu Taleb <sup>1</sup>, Mohammad Oves <sup>3</sup>, M. A. Barakat <sup>1,\*</sup>, M.A. Alghamdi <sup>1</sup> and N. H. Al-Makishah <sup>1</sup>

<sup>1</sup> Department of Environmental Sciences, Faculty of Meteorology, Environment and Arid Land Agriculture, King Abdulaziz University, Jeddah-21589, Saudi Arabia

<sup>2</sup> Center of Nanotechnology, King Abdulaziz University, Jeddah-21589, Saudi Arabia

<sup>3</sup> Center of Excellence in Environmental Studies, King Abdulaziz University, Jeddah-21589, Saudi Arabia

\* Correspondence: moansari@kau.edu.sa (M.O.A.); omaishchem@gmail.com (M.O.A.); mababdulah1@kau.edu.sa (M.A.B.); mabarakat@gmail.com (M.A.B.)

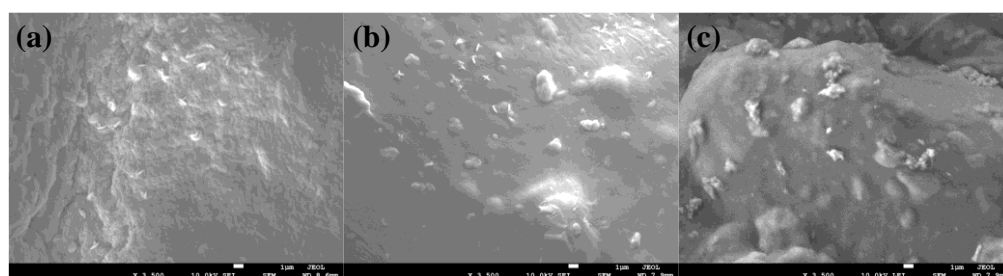

**Figure S1.** SEM images of calcium alginate beads (a), S-TiO<sub>2</sub>/alginate beads (b), and S-TiO<sub>2</sub>/WS<sub>2</sub>/alginate beads (c).
